# Supplementary material for: Aerosolizable Lipid Nanoparticles for Pulmonary Delivery of mRNA through Design of Experiments
Source: PubMed Central journal article supplement (PMC7692784; doi:10.3390/pharmaceutics12111042), 2020-10-30
Supplement: pharmaceutics-12-01042-s001.pdf [file pharmaceutics-12-01042-s001.pdf]

1 *Supplementary Material*

2 **Aerosolizable Lipid Nanoparticles for Pulmonary**  
 3 **Delivery of mRNA through Design of Experiments**

4 Hairui Zhang<sup>†</sup>, Jasmim Leal<sup>†</sup>, Melissa R. Soto, Hugh D.C. Smyth, Debadyuti Ghosh\*

5 Division of Molecular Pharmaceutics and Drug Delivery, College of Pharmacy, The University of Texas at  
 6 Austin, Austin, Texas 78712, United States

7 \* Correspondence: dghosh@austin.utexas.edu; Tel.: +01-512-232-7155

8

9

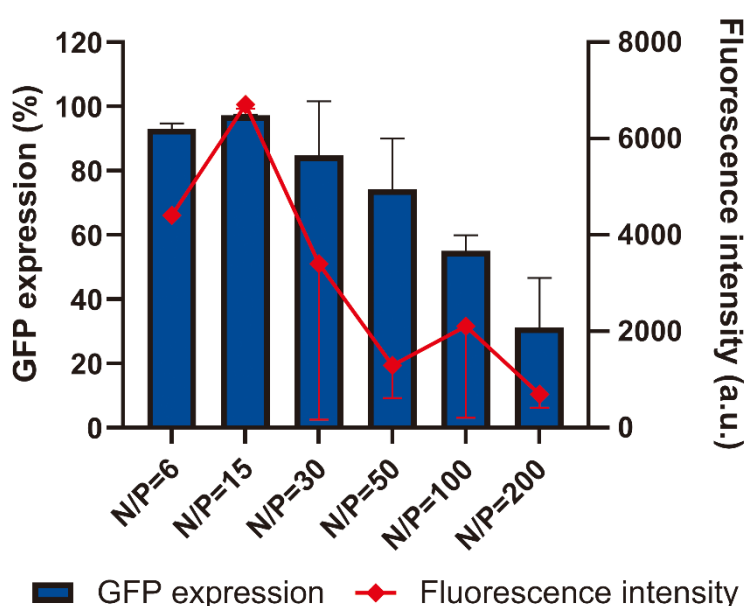

10

11 **Figure S1:** Intracellular uptake of LNP formulations at different N/P ratios in HEK-293 cells measured  
 12 by percent GFP expression (left axis) and fluorescence intensity (right axis).

13

14 **Table S1:** Limits of experimental design space

| Component       | Lower limit (molar ratio) | Upper limit (molar ratio) |
|-----------------|---------------------------|---------------------------|
| Ionizable lipid | 0.4                       | 0.6                       |
| Phospholipid    | 0.1                       | 0.2                       |
| PEG-lipid       | 0.01                      | 0.05                      |
| Cholesterol     | 0.15                      | 0.49                      |

15

16

17 **Table S2:** LNP compositions for 18 formulations.

| Formulation # | Phospholipid | PEG-lipid | Molar composition |              |           |             |
|---------------|--------------|-----------|-------------------|--------------|-----------|-------------|
|               |              |           | Dlin-MC3-DMA      | Phospholipid | PEG-lipid | Cholesterol |
| 1             | DOPE         | DMG-PEG   | 0.6               | 0.2          | 0.05      | 0.15        |
| 2             | DOPE         | DMPE-PEG  | 0.4               | 0.2          | 0.01      | 0.39        |
| 3             | DSPC         | DMG-PEG   | 0.5               | 0.14         | 0.01      | 0.35        |
| 4             | DOPE         | DMPE-PEG  | 0.6               | 0.15         | 0.03      | 0.22        |
| 5             | DSPC         | DSPE-PEG  | 0.4               | 0.2          | 0.05      | 0.35        |
| 6             | DPPC         | DMG-PEG   | 0.4               | 0.1          | 0.01      | 0.49        |
| 7             | DPPC         | DSPE-PEG  | 0.4               | 0.1          | 0.05      | 0.45        |
| 8             | DPPC         | DMG-PEG   | 0.6               | 0.2          | 0.01      | 0.19        |
| 9             | DOPE         | DSPE-PEG  | 0.6               | 0.1          | 0.05      | 0.25        |
| 10            | DOPE         | DSPE-PEG  | 0.4               | 0.2          | 0.03      | 0.37        |
| 11            | DPPC         | DMPE-PEG  | 0.6               | 0.2          | 0.01      | 0.19        |
| 12            | DSPC         | DMG-PEG   | 0.6               | 0.2          | 0.05      | 0.15        |
| 13            | DSPC         | DSPE-PEG  | 0.5               | 0.1          | 0.05      | 0.35        |
| 14            | DOPE         | DSPE-PEG  | 0.4               | 0.15         | 0.05      | 0.4         |
| 15            | DPPC         | DSPE-PEG  | 0.6               | 0.1          | 0.01      | 0.29        |
| 16            | DSPC         | DMPE-PEG  | 0.5               | 0.2          | 0.03      | 0.27        |
| 17            | DOPE         | DMG-PEG   | 0.4               | 0.16         | 0.01      | 0.43        |
| 18            | DPPC         | DMPE-PEG  | 0.4               | 0.1          | 0.03      | 0.47        |

18

19 **Table S3:** PDI of pre-nebulized LNP at Day 1 and Day 14, and nebulized LNP.

| Formulation # | PDI                          |                               |               |
|---------------|------------------------------|-------------------------------|---------------|
|               | Pre-nebulized LNP<br>- Day 1 | Pre-nebulized LNP<br>- Day 14 | Nebulized LNP |
| 1             | 0.261 ± 0.005                | 0.278 ± 0.022                 | 0.245 ± 0.051 |
| 2             | 0.093 ± 0.009                | 0.128 ± 0.009                 | 0.232 ± 0.024 |
| 3             | 0.080 ± 0.004                | 0.101 ± 0.004                 | 0.268 ± 0.005 |
| 4             | 0.161 ± 0.006                | 0.172 ± 0.014                 | 0.293 ± 0.008 |
| 5             | 0.205 ± 0.006                | 0.365 ± 0.151                 | 0.591 ± 0.076 |
| 6             | 0.035 ± 0.029                | 0.042 ± 0.015                 | 0.366 ± 0.058 |
| 7             | 0.241 ± 0.010                | 0.486 ± 0.029                 | 0.425 ± 0.017 |
| 8             | 0.041 ± 0.002                | 0.045 ± 0.026                 | 0.128 ± 0.009 |
| 9             | 0.199 ± 0.013                | 0.208 ± 0.033                 | 0.402 ± 0.050 |
| 10            | 0.155 ± 0.017                | 0.197 ± 0.008                 | 0.507 ± 0.062 |
| 11            | 0.058 ± 0.012                | 0.082 ± 0.010                 | 0.235 ± 0.005 |
| 12            | 0.111 ± 0.015                | 0.188 ± 0.008                 | 0.220 ± 0.008 |
| 13            | 0.149 ± 0.005                | 0.429 ± 0.025                 | 0.668 ± 0.131 |
| 14            | 0.240 ± 0.006                | 0.343 ± 0.010                 | 0.877 ± 0.114 |
| 15            | 0.057 ± 0.017                | 0.142 ± 0.005                 | 0.575 ± 0.090 |
| 16            | 0.115 ± 0.010                | 0.157 ± 0.003                 | 0.231 ± 0.013 |
| 17            | 0.121 ± 0.005                | 0.135 ± 0.009                 | 0.213 ± 0.005 |
| 18            | 0.214 ± 0.007                | 0.366 ± 0.008                 | 0.310 ± 0.025 |

20

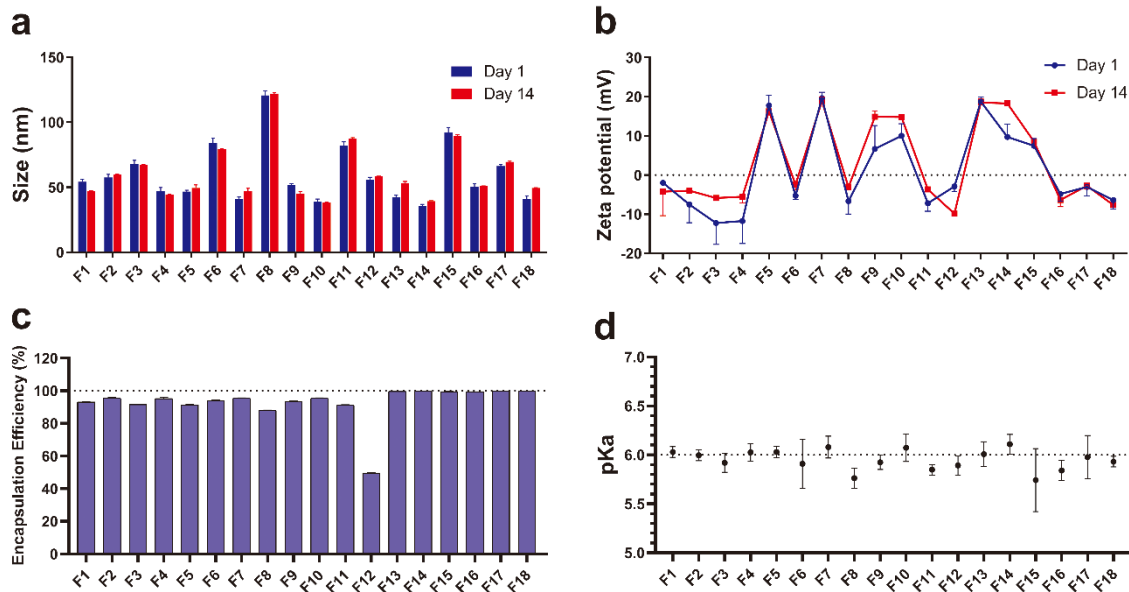

21

22 **Figure S2:** Characterization of LNP formulations. (a) size, (b) zeta-potential, (c) encapsulation  
 23 efficiency, and (d) pKa. Stability of the lipid nanoparticles was evaluated by measuring size and  
 24 zeta-potential at day 1 and after 14 days from preparation and storage at 4 °C. (mean ± SD, n=3).

25

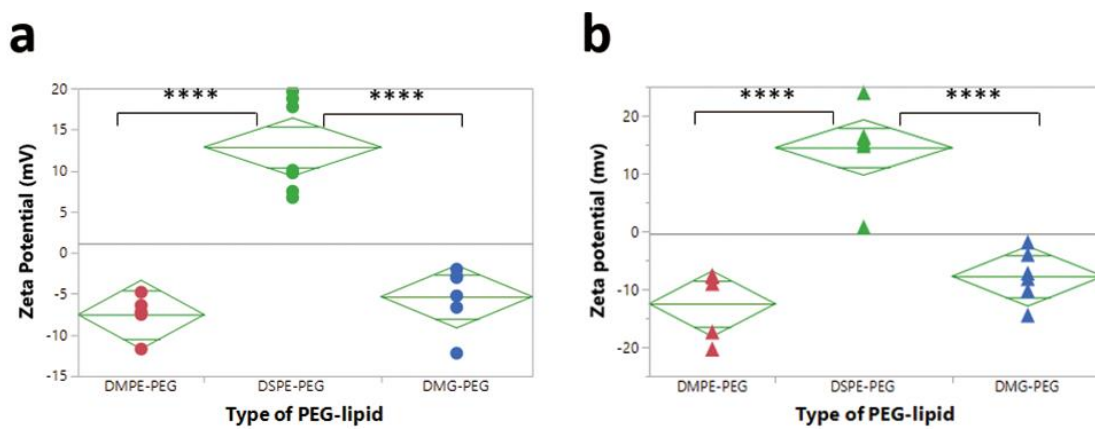

26

27 **Figure S3:** Significant effects of type of PEG-lipid on zeta potential before (a) and after (b)  
 28 nebulization.

29

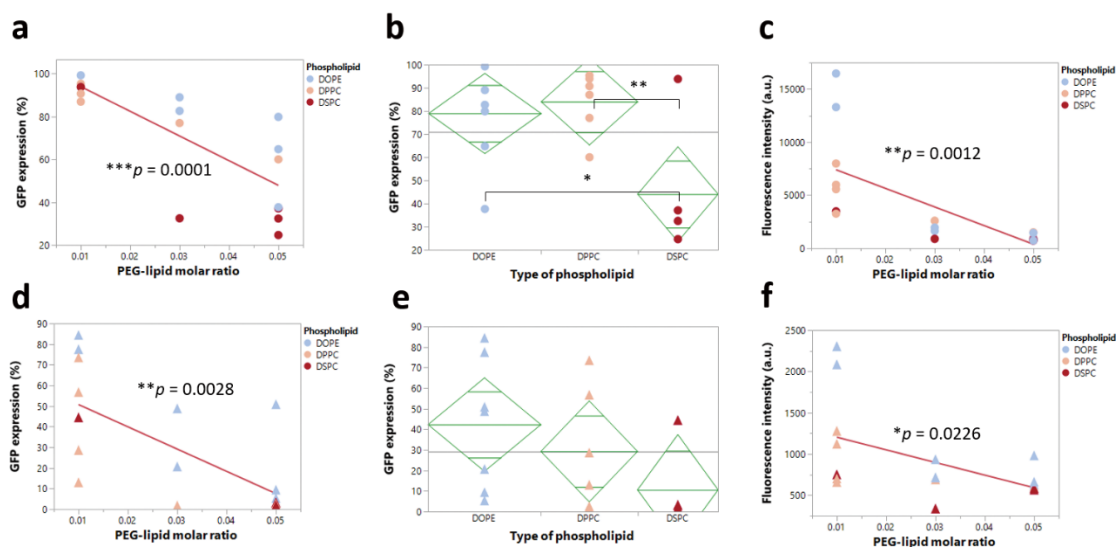

30

31 **Figure S4:** Correlation analysis between intracellular uptake (percent GFP expression and  
 32 fluorescence intensity) and PEG-lipid molar ratio or type of phospholipid in NuLi-1 cells. Significant  
 33 effect of PEG-lipid molar ratio (a) and type of phospholipid (b) on the percent GFP expression before  
 34 nebulization. (c) Significant effect of PEG-lipid molar ratio on the fluorescence intensity before  
 35 nebulization. Significant effect of PEG-lipid molar ratio (d) and no significant effect of type of  
 36 phospholipid (e) on the percent GFP expression after nebulization. (f) Significant effect of PEG-lipid  
 37 molar ratio on fluorescence intensity after nebulization.

38

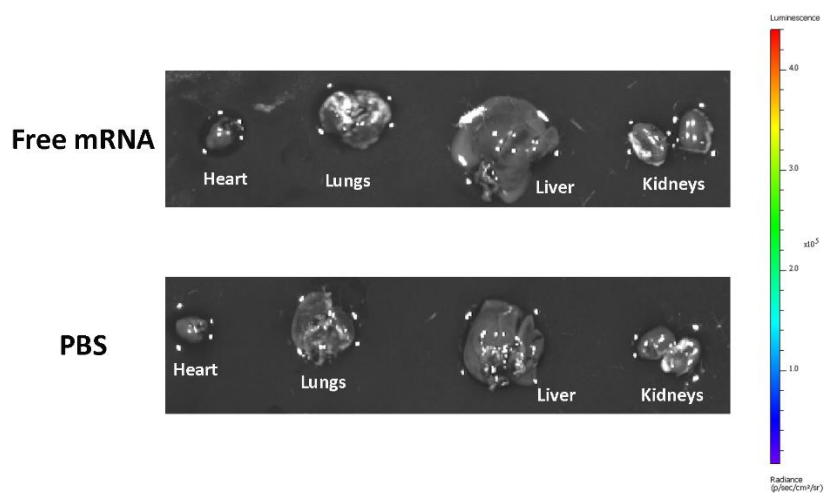

39

40 **Figure S5:** Representative images of the luciferase expression in lungs, heart, liver, and kidneys in  
 41 negative control groups measured by IVIS imaging.
